# Supplementary material
Source: PubMed Central journal article supplement (PMC2834872)
Supplement: NIHMS177582-supplement-01.pdf [file NIHMS177582-supplement-01.pdf]

## Ultraviolet B Light-induced Nitric Oxide/Peroxynitrite Imbalance in Keratinocytes—Implications for Apoptosis and Necrosis

Shiyong Wu<sup>\*1,2,3</sup>, Lei Wang<sup>1,2</sup>, Adam M. Jacoby<sup>1</sup>, Krystian Jasinski<sup>1</sup>, Ruslan Kubant<sup>1</sup> and Tadeusz Malinski<sup>1,3</sup>

<sup>1</sup>Department of Chemistry and Biochemistry, Ohio University, Athens, OH

<sup>2</sup>Edison Biotechnology Institute, Ohio University, Athens, OH

<sup>3</sup>Molecular and Cellular Biology Program, Ohio University, Athens, OH

Received 12 October 2009, accepted 27 October 2009, DOI: 10.1111/j.1751-1097.2009.00682.x

### ABSTRACT

**2** Elevation of nitric oxide (NO<sup>\*</sup>) can either promote or inhibit ultraviolet B light (UVB)-induced apoptosis. In this study, we determined real-time concentration of NO<sup>\*</sup> and peroxynitrite (ONOO<sup>-</sup>) and their role in regulation of membrane integrity and apoptosis. Nanosensors (diameter 300–500 nm) were used for direct *in situ* simultaneous measurements of NO<sup>\*</sup> and ONOO<sup>-</sup> generated by UVB in cultured keratinocytes and mice epidermis. An exposure of keratinocytes to UVB immediately generated ONOO<sup>-</sup> at maximal concentration of 190 nM followed by NO release with a maximal concentration of 91 nM. The kinetics of UVB-induced NO<sup>\*</sup>/ONOO<sup>-</sup> was in contrast to cNOS agonist stimulated NO<sup>\*</sup>/ONOO<sup>-</sup> from keratinocytes. After stimulating cNOS by calcium ionophore (CaI), NO<sup>\*</sup> release from keratinocytes was followed by ONOO<sup>-</sup> production. The [NO<sup>\*</sup>] to [ONOO<sup>-</sup>] ratio generated by UVB decreased below 0.5 indicating a serious imbalance between cytoprotective NO<sup>\*</sup> and cytotoxic ONOO<sup>-</sup> - a main component of nitroxidative stress. The NO<sup>\*</sup>/ONOO<sup>-</sup> imbalance increased membrane damage and cell apoptosis was partially reversed in the presence of free radical scavenger. The results suggest that UVB-induced and cNOS-produced NO<sup>\*</sup> is rapidly scavenged by photolytically and enzymatically generated superoxide (O<sub>2</sub><sup>-</sup>) to produce high levels of ONOO<sup>-</sup>, which enhances oxidative injury and apoptosis of the irradiated cells.

### INTRODUCTION

UVB induces the production of nitric oxide (NO<sup>\*</sup>), which plays a role in regulation of apoptosis in skin cells (1–5). NO<sup>\*</sup> is produced from L-arginine and oxygen in reaction catalyzed by nitric oxide synthase (NOS). The family of NO<sup>\*</sup> synthases consists of constitutive enzymes (cNOS), including neuronal (nNOS) and endothelial NOS (eNOS), and inducible NO<sup>\*</sup> synthase (iNOS). The activation of cNOS could be immediately triggered by elevation of the intracellular calcium level, which induces the binding of calmodulin to the inactive cNOS (6–8). The induction of iNOS is regulated through multiple signaling pathways and it could take hours to increase the expression of iNOS (9).

Most cell types residing in the skin have been reported to produce NO<sup>\*</sup> in response to appropriate stimulation. Keratinocytes (10), Langerhans cells (11), dermal fibroblasts (12), melanocytes (13) and melanoma (14) cells express iNOS upon stimulation with inflammatory cytokines. Among these cells, keratinocytes account for 90–95% of total cells in the epidermis. Keratinocytes contain cNOS, mainly neuronal NOS, which is activated by UV-induced calcium flux (15–20). UV also induces iNOS expression with a maximized mRNA level at 24 h postirradiation in human skin (9,21). UV-induced NO<sup>\*</sup> production was shown to protect cultured keratinocytes and skin from apoptotic death (2,3,5,22,23). However, all the reported studies were based on indirect observation that the inhibition of NOS or supplementation of NO<sup>\*</sup> donor during a period of 18–24 h protected keratinocytes from apoptotic death. An elevation of NO<sup>\*</sup> was detected immediately after UV irradiation in endothelial and epithelial cells (18,24). The impact of the early release of NO<sup>\*</sup> on UV-induced apoptosis has not been studied yet. In this report, we used a direct method (electrochemical nanosensors) to measure simultaneously at real time, *in situ*, the NO<sup>\*</sup> and ONOO<sup>-</sup> release from cultured keratinocytes and skin tissue of mice after irradiation of UVB. We demonstrated that UVB generated high level of ONOO<sup>-</sup> shifts unfavorable NO<sup>\*</sup>/ONOO<sup>-</sup> balance and has a pro-apoptotic effect both cultured cells and living skin.

### MATERIALS AND METHODS

**Animals.** Adult BALB/c mice were housed in a pathogen-free barrier facility in accordance with the standards of Ohio University. Mice were kept in groups of two per cage in a 12 h light/12 h dark cycle and housed at 25°C and 50% relative humidity.

**Cell culture.** The immortalized human keratinocyte cell line HaCaT was kindly provided by Dr. Hongtao Yu (Jackson State University, MS). The cells were cultured as monolayer in DMEM (Cellgro) with 10% FBS (Cellgro) at 37°C with 5% CO<sub>2</sub>.

**Nanosensors for continuous measurement of NO<sup>\*</sup> and ONOO<sup>-</sup>.** Concurrent measurement of NO<sup>\*</sup> and ONOO<sup>-</sup> were performed with electrochemical nanosensors (300–500 nm diameter). The designs are based on previously developed and well-characterized chemically modified carbon-fiber technology (25–29). Each of the sensors was made by depositing a sensing material on the tip of the carbon fiber. We used a conductive film of polymeric nickel (II) tetrakis (3-methoxy-4-hydroxyphenyl) porphyrinic for the NO<sup>\*</sup> sensor (25,28,29) and a polymeric film of Mn (III)-paracyclophanyl-porphyrin for the ONOO<sup>-</sup> sensor (26,27). Amperometry was used to measure changes in NO<sup>\*</sup> and ONOO<sup>-</sup>

\*Corresponding author email: wusl@ohio.edu (Shiyong Wu)

© 2009 The Authors. Journal Compilation. The American Society of Photobiology 0031-8655/09

concentrations from its basal level with time (detection limit of 1 nM and resolution time < 50 ms for each sensor). Linear calibration curves were constructed for each sensor from 5 nM to 3  $\mu$ M before and after measurements with aliquots of NO<sup>•</sup> and ONOO<sup>-</sup> standard solutions, respectively.

**Determination of UVB-induced NO<sup>•</sup> and ONOO<sup>-</sup> production in a single cell.** Cells were seeded at 10<sup>3</sup> cells cm<sup>-2</sup> and cultured for 12 h in complete medium. The sensors were positioned near the surface (5 ± 2  $\mu$ m) of a selected cell with the help of a computer-controlled micromanipulator. The background signals of NO<sup>•</sup> and ONOO<sup>-</sup> were stabilized and the cells were exposed to UVB irradiation at a power of 0.5 mW cm<sup>-2</sup>. The signals generated by the nanosensors were recorded continuously for 80 s.

**Determination of UVB-induced NO<sup>•</sup> and ONOO<sup>-</sup> production in living mouse skin.** The back of mice was shaved with an electric clipper 1 day prior to the experiment. Under anesthesia (ketamine 50 mg kg<sup>-1</sup> + xylazine 5 mg kg<sup>-1</sup>), the module nanosensors (total diameter 3.0 ± 0.5  $\mu$ m) were inserted into the epidermal and dermal layers. L-shaped carbon fibers with the tip sharpened in microwave plasma were used in this study. Computer-controlled micromanipulators with *x,y,z* resolution ± 2  $\mu$ m were employed to implant the sensors in the skin. The *z* coordinate (depth) was calibrated using piezoelectric currents recorded at zero distance from the skin (electrode touching the skin). The productions of NO<sup>•</sup> and ONOO<sup>-</sup> were continuously recorded. Once the background signals of NO<sup>•</sup> and ONOO<sup>-</sup> were stabilized, the mice were UVB-irradiated at a power of 0.5 mW cm<sup>-2</sup>. The productions of NO<sup>•</sup> and ONOO<sup>-</sup> were continuously recorded for 40 s.

**Inhibition of early release of NO<sup>•</sup> and ONOO<sup>-</sup> in cultured cells and skin epidermis.** An *N*-substituted L-arginine analog N<sup>G</sup>-methyl-L-arginine (L-NMMA; Sigma) was used to inhibit NOS activity; the glutathione (GSH) synthesis precursor *N*-acetyl-L-cysteine (L-NAC; Sigma) was used to scavenge free radicals and superoxide dismutase attached to polyethylene glycol (PEG-SOD) was used to dismutate superoxide (O<sub>2</sub><sup>•-</sup>). The cells were pretreated with L-NMMA (100  $\mu$ M) or L-NAC (25 mM) for 2 h and then UVB-irradiated (50 mJ cm<sup>-2</sup>). Immediately after irradiation, the cells were cultured in fresh medium without the inhibitors until further analysis. The mice were administered an intraperitoneal injection of L-NMMA (10 mg kg<sup>-1</sup>) or L-NAC (500 mg kg<sup>-1</sup>) 1 h before UVB irradiation.

**Determination of cell apoptosis and death by flow cytometry.** At 24 h postirradiation, the cells were digested with 0.01% trypsin and combined with the cells floating in the medium. An Annexin V: FITC Apoptosis Detection Kit II (BD Pharmingen) was used following the manufacturer's protocol. The annexin V-fluorescein isothiocyanate (FITC)/PI stained cells were analyzed by using a FACS<sup>®</sup> Sort Flow Cytometer (Becton Dickinson) equipped with CellQuest software (Becton Dickinson). The parameter of the measurement was set at SSC 350, FL1 700 and FL2 700, and a total 10 000 cells were counted.

**Cell injury assay using calcium green-1 acetoxymethyl ester (CAG-AM) and PI fluorescence staining.** At 1 h postirradiation, the cells were incubated with CAG-AM (2.5  $\mu$ M; Invitrogen) and PI (50  $\mu$ g mL<sup>-1</sup>) for 30 min at room temperature. After washing three times with PBS, fluorescence images were acquired by a camera connected to a confocal microscope (LSM 510; Carl Zeiss) at excitation and emission wavelengths of 506/531 nm for calcium green-1 and 535/617 nm for PI, respectively.

**Analysis of membrane damage in mice epidermis.** At 24 h before UVB exposure, mice were shaved with electric clippers. Non-UVB-treated controls were also shaved to maintain a constant protocol. The mice were anesthetized with Avertin and treated with the chemical and/or UVB (100 mJ cm<sup>-2</sup>). Immediately after irradiation, the mice were injected subcutaneously with 0.1 mL of PI (100  $\mu$ g mL<sup>-1</sup>; Sigma). Thirty minutes after PI injection, the mice were euthanized by decapitation and skin tissue was harvested and sliced with a cryostat section in 40 nm thickness. The fluorescent images were acquired by a camera connected to a Nikon fluorescent microscope at excitation and emission wavelengths of 535 and 617 nm, respectively. The intensity of the PI staining was analyzed using ImageJ (v1.42k; NIH).

**Western blotting.** HaCaT cells were treated with L-NMMA and L-NAC for 2 h before UVB irradiation. At 24 h post-UVB, the cells were lysed at 4°C in NP-40 lysis buffer (2% NP-40, 80 mM NaCl, 100 mM Tris-HCl, 0.1% SDS) containing a Proteinase Inhibitor Cocktail (Complete<sup>™</sup>; Roche Molecular Biochemicals). The protein samples were then added to five-fold Laemmli buffer (0.32 M Tris-HCl, pH 6.8, 0.5 M glycine, 10% SDS, 50% glycerol and 0.03% bromophenol blue) and boiled. These samples were separated on an SDS-PAGE gel and then transferred onto a nitrocellulose membrane.

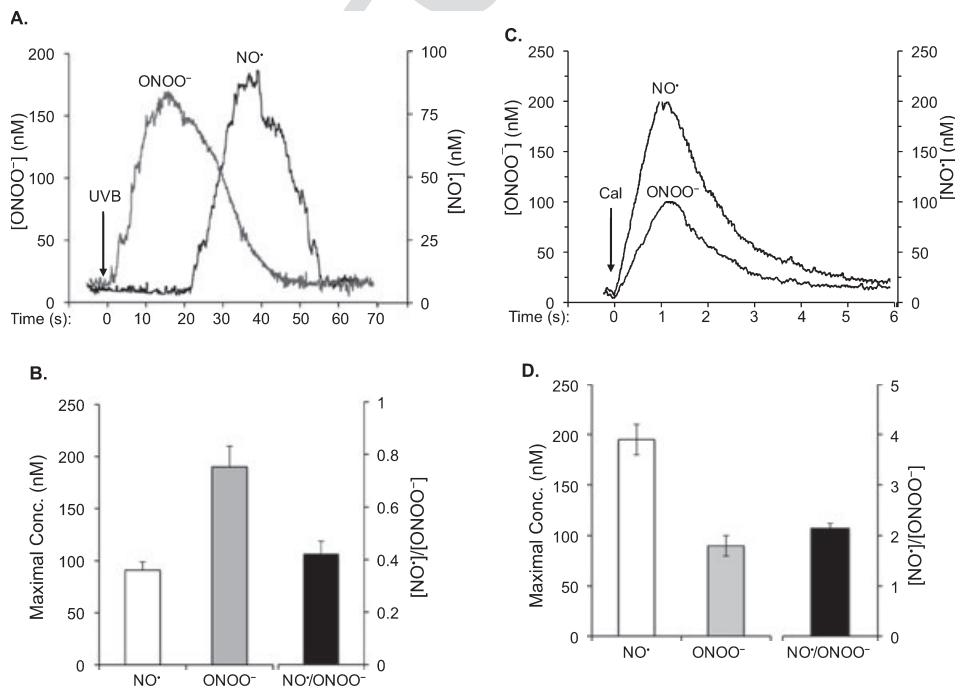

**Figure 1.** NO<sup>•</sup> and ONOO<sup>-</sup> amperograms (current calibrated as concentration vs time) and maximal [NO<sup>•</sup>], [ONOO<sup>-</sup>] and a ratio of [NO<sup>•</sup>]/[ONOO<sup>-</sup>] measured in a keratinocyte after UVB irradiation. (A) Amperograms of NO<sup>•</sup> and ONOO<sup>-</sup> release from the cells irradiated with UVB for 1 min at 0.5 mW cm<sup>-2</sup>. (B) Maximal [NO<sup>•</sup>], [ONOO<sup>-</sup>] and a ratio of maximal [NO<sup>•</sup>]/[ONOO<sup>-</sup>] produced by a keratinocyte after treating with UVB. (C) Amperograms of NO<sup>•</sup> and ONOO<sup>-</sup> release from the cells stimulated by CaI (1  $\mu$ M) in 6 s. (D) Maximal [NO<sup>•</sup>], [ONOO<sup>-</sup>] and a ratio of maximal [NO<sup>•</sup>]/[ONOO<sup>-</sup>] produced by a keratinocyte after treating with CaI. The data in (B) and (D) represent the average of three sets of independent measurements.

The membrane was blocked with 5% (wt/vol) skim milk in TBST (20 mM Tris [pH 7.5], 150 mM NaCl, 0.1% Tween 20) for 1 h and then incubated with anti-poly(ADP-ribose) polymerase (anti-PARP) antibodies (obtained from Santa Cruz Biotechnology) at 4°C overnight. After washing with TBST, the membrane was incubated with HRP-conjugated anti-rabbit antibody for 1 h at room temperature. The membrane was then washed three times in TBST and two times in TBS, and developed in West Pico Supersignal chemiluminescent substrate (Pierce).

**UVB irradiation.** UVB was generated from an 8 or 15 W UVB lamp (UVP). The intensity of UVB was standardized by an UVB-meter (UVP). The media was replaced with PBS during the irradiation. After UVB irradiation, fresh medium added to each plate was used in the experiments.

**Statistical analysis.** Student's *t*-test was used to analyze the significance of data.  $P < 0.05$  was considered significant.

## RESULTS

### UVB induces release of NO<sup>•</sup> and ONOO<sup>-</sup> in cultured human keratinocytes

NO<sup>•</sup> can rapidly react with O<sub>2</sub><sup>•-</sup> to form ONOO<sup>-</sup> (30,31), a highly oxidative molecule (32). To determine the biological property of NO<sup>•</sup> after UV irradiation, we measured the real-time production of NO<sup>•</sup> and ONOO<sup>-</sup> in UVB-treated HaCaT by using a NO<sup>•</sup> or ONOO<sup>-</sup> nanosensor. After positioning the nanosensors near the surface of keratinocytes ( $5 \pm 2 \mu\text{m}$ ), the productions of NO<sup>•</sup> or ONOO<sup>-</sup> were continuously monitored. Our data showed that 4 s after the exposure of the keratinocytes to UVB, a rapid release of ONOO<sup>-</sup> was observed (Fig. 1A). A maximal [ONOO<sup>-</sup>] of  $190 \pm 20$  was reached after  $15 \pm 2$  s postirradiation (Fig. 1A,B). NO<sup>•</sup> release was recorded after  $20 \pm 2$  s and reached a maximal level of  $91 \pm 8$  nM at  $40 \pm 5$  s post radiation (Fig. 1A,B). These results suggest that the cells were under high oxidative stress when NO<sup>•</sup> was just released after UVB irradiation.

To determine maximal concentrations of NO<sup>•</sup> and ONOO<sup>-</sup> in the keratinocytes, we measured NO<sup>•</sup>/ONOO<sup>-</sup> after stimulation of cNOS with the calcium-independent agonist, CaI. The kinetics of CaI-stimulated ONOO<sup>-</sup> and NO<sup>•</sup> release was distinctively different from that observed after UVB stimulation (Fig. 1C vs 1A). A rapid increase in [NO<sup>•</sup>] was observed after less than 0.1 s after treatment of CaI. The maximal [NO<sup>•</sup>] ( $195 \pm 15$  nM) was reached about  $1.0 \pm 0.1$  s postinjection of CaI. The release of NO<sup>•</sup> was followed by the release of ONOO<sup>-</sup> ( $0.3 \pm 0.1$  s after treatment of CaI), which reached a maximum of  $90 \pm 10$  nM after  $1.2 \pm 0.1$  s. A ratio of [NO<sup>•</sup>]/[ONOO<sup>-</sup>] was used to quantify a level of oxidative/nitroxidative stress and NO<sup>•</sup>/ONOO<sup>-</sup> imbalance in keratinocytes after stimulation with UVB or CaI (Fig. 1B,D). High [NO<sup>•</sup>]/[ONOO<sup>-</sup>] ratio indicates high concentration of bioavailable, cytoprotective NO<sup>•</sup> and/or low levels of cytotoxic ONOO<sup>-</sup>. The ratio of [NO<sup>•</sup>]/[ONOO<sup>-</sup>] was  $0.42 \pm 0.05$  after stimulation of keratinocytes with UVB radiation and  $2.15 \pm 0.10$  after stimulation with CaI. These results suggest that there is a rapid increase in O<sub>2</sub><sup>•-</sup>, which reacts with NO<sup>•</sup> to form ONOO<sup>-</sup> after UVB irradiation.

To confirm that the UVB-induced elevation of O<sub>2</sub><sup>•-</sup> leads to the imbalance of [NO<sup>•</sup>]/[ONOO<sup>-</sup>], we analyzed the production of [NO<sup>•</sup>] and [ONOO<sup>-</sup>] in the presence of the cNOS inhibitor L-NAME and a membrane-permeable superoxide dismutase PEG-SOD. In the presence of L-NAME, both [NO<sup>•</sup>] and [ONOO<sup>-</sup>] decreased significantly (Fig. 2).

However, the decrease in NO<sup>•</sup> was more pronounced (about 85%) than the decrease in ONOO<sup>-</sup> (about 70%). An incubation of keratinocytes with PEG-SOD increased the NO<sup>•</sup> level to  $165 \pm 15$  nM (80% increase vs control) while ONOO<sup>-</sup> level decreased by about 30% compared to control. [NO<sup>•</sup>]/[ONOO<sup>-</sup>] ratio did not change significantly in the presence of L-NAME and increased significantly in the presence of PEG-SOD (Fig. 2B). These results demonstrate that UVB-induced production of NO<sup>•</sup> was accompanied by an elevation of O<sub>2</sub><sup>•-</sup>, most likely due to photolytic reaction of oxygen and/or O<sub>2</sub><sup>•-</sup> production by uncoupled cNOS.

### UVB induces NO<sup>•</sup> and ONOO<sup>-</sup> production in skin epidermis *in vivo*

After quantitatively analyzing NO<sup>•</sup> and ONOO<sup>-</sup> in cultured cells, we determined the UVB-induced release of NO<sup>•</sup> and ONOO<sup>-</sup> in living mouse skin. The module nanosensors (total diameter  $3.0 \pm 0.5 \mu\text{m}$ ) were inserted underneath the skin surface of the anesthetized mouse (Fig. 3A) and the productions of NO<sup>•</sup> or ONOO<sup>-</sup> were continuously recorded (Fig. 3B) before and after the irradiation. Our data show that the exposure of the living skin to UVB causes a rapid release of

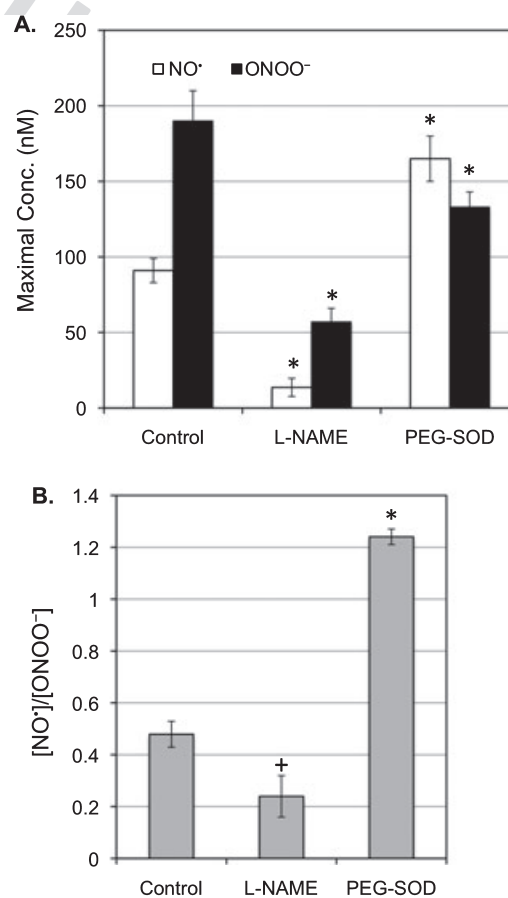

**Figure 2.** NO<sup>•</sup> and ONOO<sup>-</sup> release from the cells irradiated with UVB ( $0.5 \text{ mW cm}^{-2}$ ) for 1 min in the presence or absence of L-NAME ( $2 \mu\text{M}$ ) or PEG-SOD (100 U). (A) Maximal [NO<sup>•</sup>] and [ONOO<sup>-</sup>] produced by a keratinocyte after UVB treatment. (B) A ratio of maximal [NO<sup>•</sup>]/[ONOO<sup>-</sup>] produced by a keratinocyte after UVB treatment. The data represent the average of three sets of independent measurements. \* $P < 0.001$  vs control; + $P < 0.1$  vs control.

1 NO<sup>•</sup> and ONOO<sup>-</sup> at 4 s postirradiation. Interestingly, while  
 2 the release of ONOO<sup>-</sup> rapidly reaches a maximum of  
 3 270 ± 20 nM at 15 s postirradiation and slowly reduced, the  
 4 release of NO<sup>•</sup> remains raising to 150 ± 8 nM at the end of the  
 5 measurement (Fig. 3B,C). Our results demonstrate that the  
 6 patterns for the release of NO<sup>•</sup> and ONOO<sup>-</sup> in response to  
 7 UVB irradiation are distinctive in cultured cells and living skin  
 8 (Fig. 3B vs 1A).

### Early elevation of NO<sup>•</sup> and oxidative stress mediates UVB-induced death of keratinocytes

13 As an elevation of NO<sup>•</sup> could be pro- or anti-apoptotic (33),  
 14 we determined whether this early release of NO<sup>•</sup> in combination  
 15 with ONOO<sup>-</sup> inhibits or promotes apoptosis of cultured  
 16 HaCaT cells upon UVB irradiation. The cell death was

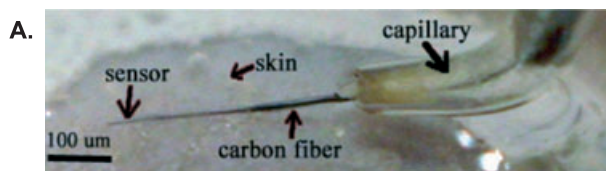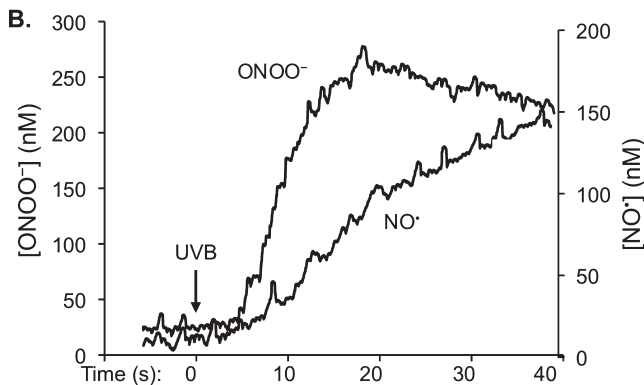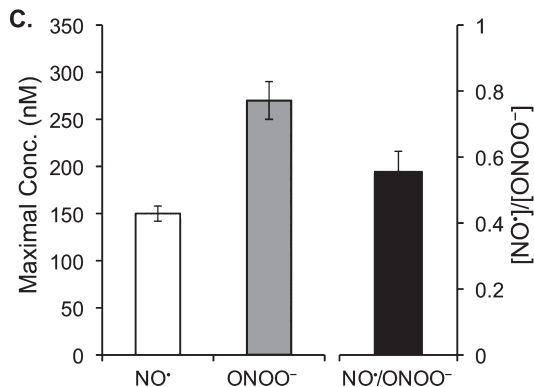

55 **Figure 3.** *In vivo* measurement of NO<sup>•</sup> and ONOO<sup>-</sup> in UVB-irradiated  
 56 mouse skin using a nanosensor. (A) A micrograph of L-shaped  
 57 sharpened carbon fibers with a module of NO<sup>•</sup> and ONOO<sup>-</sup> sensors  
 58 deposited at the tip of the carbon fibers. The module was implanted in  
 59 the skin of a mouse. (B) Maximal [NO<sup>•</sup>], [ONOO<sup>-</sup>] and a ratio of  
 60 maximal [NO<sup>•</sup>]/[ONOO<sup>-</sup>] produced by the irradiated skin. (C)  
 61 Maximal [NO<sup>•</sup>], [ONOO<sup>-</sup>] and a ratio of maximal [NO<sup>•</sup>]/[ONOO<sup>-</sup>]  
 produced by a keratinocyte after UVB treatment. The data represent  
 the average of three sets of independent measurements.

analyzed using annexin V and PI double-staining to determine  
 the loss of membrane phospholipid symmetry and membrane  
 integrity (34,35). At 24 h postirradiation, the UVB-induced  
 apoptotic cell death was reduced from 17.6 ± 1.7% to  
 14.4 ± 1.5% or 10.8 ± 1.0%, respectively, upon L-NMMA  
 or L-NAC treatment (Fig. 4A). The effects of L-NMMA and L-  
 NAC on UVB-induced cell death were also analyzed by  
 determination of cleavage of poly (ADP-ribose) polymerase  
 (PARP). Our data showed that UVB induced a cleavage of  
 116 kDa PARP to an 89-kDa fragment (Fig. 4B, lane 2 vs 1),  
 which is the marker for cell apoptosis. Treating the cells with  
 L-NMMA and L-NAC partially protected PARP cleavage

### A: Flow cytometry analysis of apoptosis.

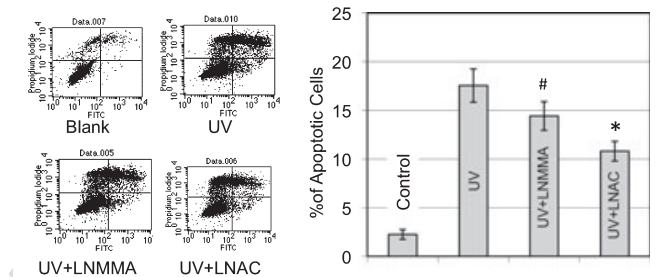

### B. PARP Cleavage.

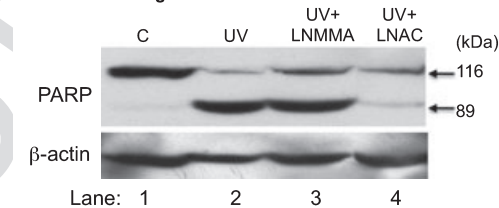

### C. Analysis of loss of cell membrane integrity.

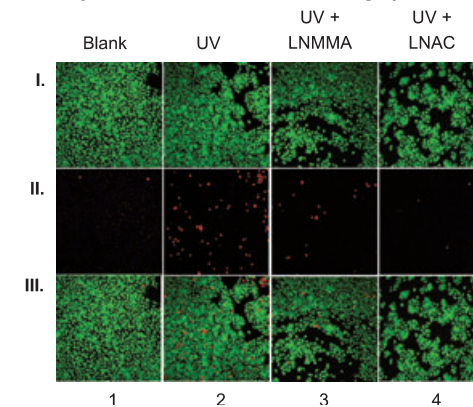

62 **Figure 4.** HaCaT cells were treated with L-NMMA (100 μM) or L-NAC  
 (25 mM) for 2 h and then irradiated with UVB (50 mJ cm<sup>-2</sup>). (A) The  
 63 cells were double-stained with Annexin V/PI at 24 h postirradiation.  
 64 The percentages of apoptotic cells were determined by flow cytometric  
 65 analysis. The data represent the average of three sets of independent  
 66 measurements. *P* < 0.01 vs UVB alone; \**P* < 0.005 vs UVB alone.  
 67 (B) The cells were lysed at 24 h postirradiation and Western blot  
 68 analysis was used to determine the PARP cleavage. (C) The cells were  
 69 double-stained with CAG/PI at 1 h postirradiation. The images were  
 70 captured by fluorescence confocal microscopy. (I) Living cells stained  
 71 by CAG-AM (2.5 μM). (II) Injured cells that lost membrane integrity  
 were stained with PI (50 μg mL<sup>-1</sup>). (III) Pictures (I) and (II) overlaid  
 on top of each other.

upon UVB irradiation (Fig. 4B, lanes 3 and 4 vs lane 4). Interestingly, treating the cells with L-NAC did not only reduce the PARP cleavage but also reduced the PARP expression after UVB irradiation (Fig. 4B, lane 4 vs lanes 1–3). The data agreed with our previous reports, which indicated that L-NAC protects eIF2 $\alpha$  from UV-induced phosphorylation (36) and elimination of eIF2 $\alpha$  phosphorylation reduces PARP expression after UV treatment (37).

In addition to apoptosis, we also determined whether the early release of NO $^*$  initiates necrotic death of UVB-treated HaCaT cells. Necrosis is initiated due to injury to the cells, which could be characterized by the loss of membrane integrity (38). We analyzed membrane integrity using the PI staining method. The amount of living cells were stained and visualized by using CAG-AM staining. Our data show that UVB irradiation induces a loss of membrane integrity in the cells within 1 h of treatment (Fig. 4C, column 2 vs 1). The inhibition of NOS or free radicals significantly reduces the amount of injured cells (Fig. 5B, columns 3 and 4 vs 2). Our results demonstrate that the early release of NO $^*$  and ONOO $^-$  mediates UVB-induced apoptotic and necrotic death of cells.

### UVB-induced elevation of NO $^*$ and oxidative stress leads to tissue damage

To assess the role of NOS and oxidative stress in UVB-induced skin injury, we analyzed the effect of L-NMMA and L-NAC on UVB-induced loss of membrane integrity in living mice skin tissue. Compared to the samples from the UVB-irradiated mice, the skin tissue harvested from the mice with L-NMMA showed a significant decrease in fluorescence intensity in the epidermis (Fig. 5), which consists of 90–95% of keratinocytes. The treatment of L-NAC almost totally inhibited UVB-induced tissue injury (Fig. 5). These results demonstrated that UVB-induced rapid activation of NOS in combination with oxidative stress led to the loss of membrane integrity and skin injury.

### DISCUSSION

UVB induces a rapid release of NO $^*$  and O $_2^{\bullet-}$  in cultured keratinocytes (24). However, the formation of the more reactive ONOO $^-$  has never been directly measured after UVB irradiation. Furthermore, the effect of UVB radiation

COLOUR

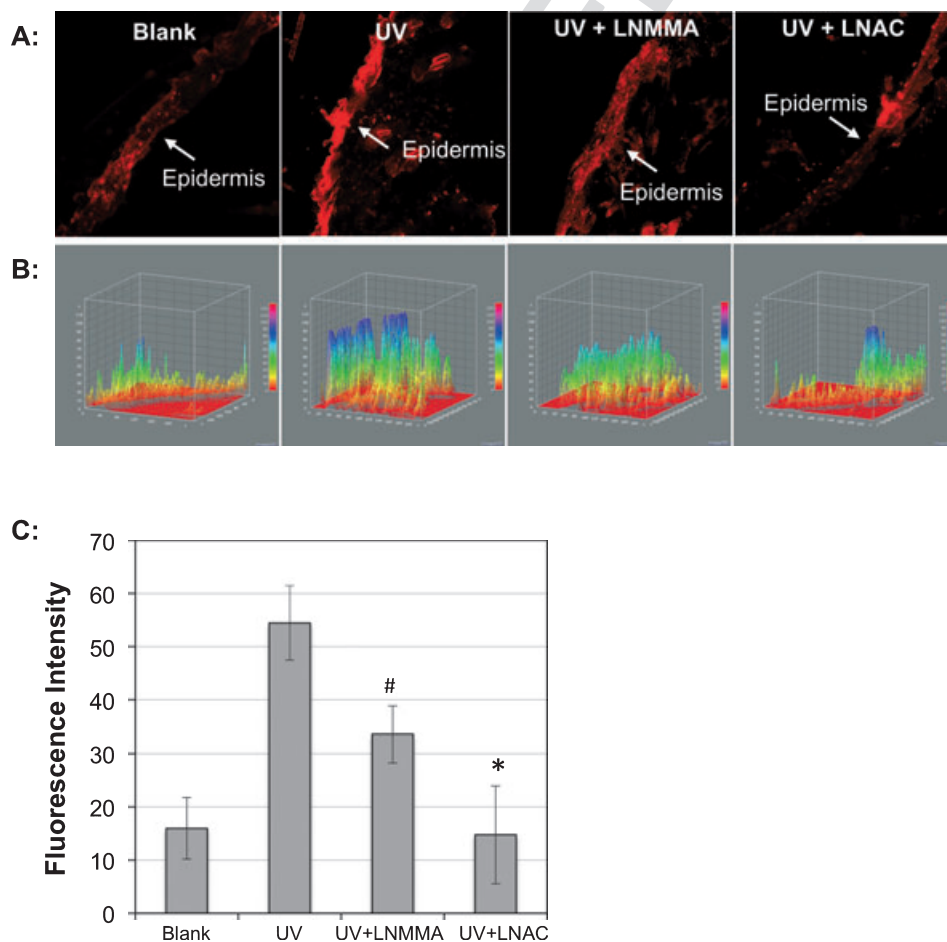

**Figure 5.** PI staining was used to determine the UVB-induced injury of skin tissue of mice. The mice were injected intraperitoneally with L-NMMA (10 mg kg $^{-1}$ ) or L-NAC (500 mg kg $^{-1}$ ) at 1 h before UVB irradiation. Immediately after irradiation, the mice were injected subcutaneously with 0.1 mL PI (100  $\mu$ g mL $^{-1}$ ) and the skin tissues were collected at 30 min postirradiation. The images of the skin sections were captured by fluorescence microscope. (A) Images of the PI-stained skin slices. (B) A 3-D analysis of the fluorescence intensity of the PI staining skin tissue using ImageJ (v1.34k; NIH). The fluorescence intensity is analyzed against distance of the slice in two dimensions. (C) The average fluorescence intensity of three measurements.  $P < 0.01$  vs UVB alone;  $*P < 0.02$  vs UVB alone.

on NO<sup>•</sup> production in the skin has been assessed only with the use of indirect methods (39). Indirect measurements cannot separate an effect of NO<sup>•</sup> in biological milieu from the effect of ONOO<sup>-</sup>. In this study we used highly sensitive, selective, millisecond response-time electrochemical nanosensors (40) to directly measure the concentration of UVB- and CaI-stimulated NO<sup>•</sup> and ONOO<sup>-</sup> release in cultured keratinocytes and in the epidermis of mice.

Our results demonstrate that a short-time exposure of cultured keratinocytes or the epidermis of mice to UVB irradiation stimulated NO<sup>•</sup> release as well as ONOO<sup>-</sup> production (Figs. 1 and 3). The study of NOS activity showed dependence upon calcium, indicating the involvement of the cNOS rather than the iNOS in NO<sup>•</sup>/ONOO<sup>-</sup> production (Fig. 2). As the crucial role of NO<sup>•</sup> in the physiology of vasculature has become well established, the question arises whether NO<sup>•</sup> directly or indirectly, through the formation of more reactive oxidative species such as ONOO<sup>-</sup>, averts its deleterious biological effects. It is interesting to note that the UVB-induced ONOO<sup>-</sup> release in cultured keratinocytes precedes the production of bioavailable (diffusible) NO<sup>•</sup> (Fig. 1). This is in contrast to calcium-stimulated NO<sup>•</sup> release where the generation of ONOO<sup>-</sup> follows the production of NO<sup>•</sup> (Fig. 2). To explain the differences in the effect of UVB on NO<sup>•</sup> production vs ONOO<sup>-</sup> production, it may help to realize that the NO<sup>•</sup> sensor used in this study detects the net concentration of NO<sup>•</sup> (*i.e.* NO<sup>•</sup> that is not consumed in fast chemical reactions and can freely diffuse to a target cell and trigger cGMP production). This net concentration depends not only on the activity of eNOS but also on the production of O<sub>2</sub><sup>•-</sup>. NO<sup>•</sup> rapidly reacts with O<sub>2</sub><sup>•-</sup> in diffusion-controlled reactions ( $k = 6 \times 10^{10} \text{ nmol}^{-1}\text{s}^{-1}$ ) to form ONOO<sup>-</sup>. There are several potential sources of O<sub>2</sub><sup>•-</sup> in cells including NAD(P)H, cNOS, mitochondria and others. It is also well established that UVB induces O<sub>2</sub><sup>•-</sup> production (24,41). UVB exposure generates O<sub>2</sub><sup>•-</sup> immediately after the exposure, and the reactive oxygen species thus produced remains for 100–1200 s. The data presented here indicate that initially produced ONOO<sup>-</sup> is most likely a result of the reaction between O<sub>2</sub><sup>•-</sup> generated by photolytic reduction

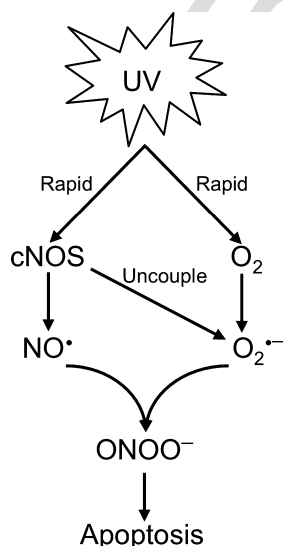

**Figure 6.** Model of UVB-induced and NO<sup>•</sup>-enhanced apoptotic signaling pathways.

of oxygen and NO<sup>•</sup> generated by uncoupled cNOS. ONOO<sup>-</sup> is formed when NO<sup>•</sup> and O<sub>2</sub><sup>•-</sup> react in a fast ( $k = 2 \times 10^{10} \text{ mol}^{-1}\text{s}^{-1}$ ) reaction (30,31). Formation of ONOO<sup>-</sup> is favored by the overproduction of O<sub>2</sub><sup>•-</sup> and/or NO<sup>•</sup>.

After measuring the kinetics of NO<sup>•</sup> and ONOO<sup>-</sup> productions, we determined the role of the early cNOS activation and NO<sup>•</sup>/ONOO<sup>-</sup> imbalance in UVB-induced apoptosis by analyzing Annexin V-FITC/PI double-stained cells or PARP cleavage. L-NAC, a commonly used ONOO<sup>-</sup> reducer (36,42,43), was used to increase the ratio of NO<sup>•</sup>/ONOO<sup>-</sup>. Our data showed that preincubation of the cells with either an NOS inhibitor or an antioxidant reduced apoptotic death of the UVB-treated cells (Fig. 4). These results suggest that the early NO<sup>•</sup> release enhances oxidative stress-induced apoptosis upon UVB irradiation. The UVB-induced apoptosis is likely to be triggered by the oxidative damage to the cell membrane at the early stage of irradiation. NO<sup>•</sup> is an unstable molecule, which rapidly reacts with O<sub>2</sub><sup>•-</sup> to form ONOO<sup>-</sup> and its protonated form (ONOOH). ONOO<sup>-</sup> is a potent inducer of apoptosis (44,45). While [O<sub>2</sub><sup>•-</sup>] is low, ONOO<sup>-</sup> can isomerize to harmless NO<sub>3</sub><sup>-</sup>. However, at high [O<sub>2</sub><sup>•-</sup>], ONOO<sup>-</sup> undergoes a hemolytic or heterolytic cleavage to form strong oxidants including HO<sup>•</sup>, NO<sub>2</sub><sup>-</sup> and NO<sub>2</sub><sup>+</sup>. These species initiate a cascade of events leading to an increase in cytotoxicity and trigger cellular damage. In UVB-treated cells, high levels of O<sub>2</sub><sup>•-</sup> can be generated by reduction of O<sub>2</sub>, by uncoupled eNOS or by other sources like NADP(H) oxidase. However, the most effective generator of O<sub>2</sub><sup>•-</sup> is uncoupled cNOS (46). Our data showed that the early activation of cNOS led to an injury of the cultured cells and skin tissue within 1 h postirradiation (Figs. 4C and 5). The UVB-induced membrane damage of cells or skin tissue could be reduced or prevented by pretreatment of L-NMMA or L-NAC (Figs. 4C and 5). Furthermore, the early membrane damage correlated with the late apoptosis of the irradiated cells. These results suggest that UVB-induced apoptosis could be triggered by an early-induced NO<sup>•</sup> release in combination with high production of O<sub>2</sub><sup>•-</sup>. Based on our results, we propose a novel model (Fig. 6) that UVB induced immediate activation of cNOS and production of NO<sup>•</sup>, which rapidly reacts with O<sub>2</sub><sup>•-</sup> to form ONOO<sup>-</sup>, which induces oxidative membrane damage and apoptosis of the irradiated cells.

*Acknowledgements*—This work is partially supported by R56 CA86928 (to S.W.) and RO1 CA086928 (to S.W.).

## REFERENCES

- Oplander, C., M. M. Cortese, H. G. Korth, M. Kirsch, C. Mahotka, W. Wetzel, N. Pallua and C. V. Suschek (2007) The impact of nitrite and antioxidants on ultraviolet-A-induced cell death of human skin fibroblasts. *Free Radic. Biol. Med.* **43**, 818–829.
- Suschek, C. V., K. Briviba, D. Bruch-Gerharz, H. Sies, K. D. Kroncke and V. Kolb-Bachofen (2001) Even after UVA-exposure will nitric oxide protect cells from reactive oxygen intermediate-mediated apoptosis and necrosis. *Cell Death Differ.* **8**, 515–527.
- Suschek, C. V., V. Krischel, D. Bruch-Gerharz, D. Berendji, J. Krutmann, K. D. Kroncke and V. Kolb-Bachofen (1999) Nitric oxide fully protects against UVA-induced apoptosis in tight correlation with Bcl-2 up-regulation. *J. Biol. Chem.* **274**, 6130–6137.
- Weller, R., T. Billiar and Y. Vodovotz (2002) Pro- and anti-apoptotic effects of nitric oxide in irradiated keratinocytes: The

- 1 role of superoxide. *Skin Pharmacol. Appl. Skin Physiol.* **15**, 348–  
2 352.
- 3 5. Yamaoka, J., S. Kawana and Y. Miyachi (2004) Nitric oxide  
4 inhibits ultraviolet B-induced murine keratinocyte apoptosis by  
5 regulating apoptotic signaling cascades. *Free Radic. Res.* **38**, 943–  
6 950.
- 7 6. Madajka, M., M. Korda, J. White and T. Malinski (2003) Effect  
8 of aspirin on constitutive nitric oxide synthase and the bioavaila-  
9 bility of NO. *Thromb. Res.* **110**, 317–321.
- 10 7. Newman, E., D. E. Spratt, J. Mosher, B. Cheyne, H. J.  
11 Montgomery, D. L. Wilson, J. B. Weinberg, S. M. Smith, J. C.  
12 Salerno, D. K. Ghosh and J. G. Guillemette (2004) Differential  
13 activation of nitric-oxide synthase isozymes by calmodulin-tro-  
14 ponin C chimeras. *J. Biol. Chem.* **279**, 33547–33557.
- 15 8. Zhang, Z. G., M. Chopp, F. Bailey and T. Malinski (1995) Nitric  
16 oxide changes in the rat brain after transient middle cerebral ar-  
17 tery occlusion. *J. Neurol. Sci.* **128**, 22–27.
- 18 9. Kuhn, A., K. Fehsel, P. Lehmann, J. Krutmann, T. Ruzicka and  
19 V. Kolb-Bachofen (1998) Aberrant timing in epidermal expression  
20 of inducible nitric oxide synthase after UV irradiation in cutane-  
21 ous lupus erythematosus. *J. Invest. Dermatol.* **111**, 149–153.
- 22 10. Arany, I., M. M. Brysk, H. Brysk and S. K. Tying (1996) Reg-  
23 ulation of inducible nitric oxide synthase mRNA levels by differ-  
24 entiation and cytokines in human keratinocytes. *Biochem.*  
25 *Biophys. Res. Commun.* **220**, 618–622.
- 26 11. Qureshi, A. A., J. Hosoi, S. Xu, A. Takashima, R. D. Granstein  
27 and E. A. Lerner (1996) Langerhans cells express inducible nitric  
28 oxide synthase and produce nitric oxide. *J. Invest. Dermatol.* **107**,  
29 815–821.
- 30 12. Wang, R., A. Ghahary, Y. J. Shen, P. G. Scott and E. E. Tredget  
31 (1996) Human dermal fibroblasts produce nitric oxide and express  
32 both constitutive and inducible nitric oxide synthase isoforms. *J.*  
33 *Invest. Dermatol.* **106**, 419–427.
- 34 13. Rocha, I. M. and L. A. Guillo (2001) Lipopolysaccharide and  
35 cytokines induce nitric oxide synthase and produce nitric oxide in  
36 cultured normal human melanocytes. *Arch. Dermatol. Res.* **293**,  
37 245–248.
- 38 14. Tsatmali, M., P. Manning, C. J. McNeil and A. J. Thody (1999)  
39 alpha-MSH inhibits lipopolysaccharide induced nitric oxide pro-  
40 duction in B16 mouse melanoma cells. *Ann. N. Y. Acad. Sci.* **885**,  
41 474–476.
- 42 15. Deliconstantinos, G., V. Villiotou and J. C. Stavrides (1996) Nitric  
43 oxide and peroxynitrite released by ultraviolet B-irradiated human  
44 endothelial cells are possibly involved in skin erythema and  
45 inflammation. *Exp. Physiol.* **81**, 1021–1033.
- 46 16. Deliconstantinos, G., V. Villiotou and J. C. Stavrides (1995)  
47 Release by ultraviolet B (u.v.B) radiation of nitric oxide (NO)  
48 from human keratinocytes: A potential role for nitric oxide in  
49 erythema production. *Br. J. Pharmacol.* **114**, 1257–1265.
- 50 17. Ignarro, L. J., G. M. Buga, K. S. Wood, R. E. Byrns and G.  
51 Chaudhuri (1987) Endothelium-derived relaxing factor produced  
52 and released from artery and vein is nitric oxide. *Proc. Natl Acad.*  
53 *Sci. USA* **84**, 9265–9269.
- 54 18. Kubaszewski, E., A. Peters, S. McClain, D. Bohr and T. Malinski  
55 (1994) Light-activated release of nitric oxide from vascular smooth  
56 muscle of normotensive and hypertensive rats. *Biochem. Biophys.*  
57 *Res. Commun.* **200**, 213–218.
- 58 19. Marletta, M. A. (1989) Nitric oxide: Biosynthesis and biological  
59 significance. *Trends Biochem. Sci.* **14**, 488–492.
- 60 20. Nathan, C. (1997) Inducible nitric oxide synthase: What difference  
61 does it make? *J. Clin. Invest.* **100**, 2417–2423.
21. Meeran, S. M., N. Katiyar, T. Singh and S. K. Katiyar (2009)  
Loss of endogenous interleukin-12 activates survival signals in  
ultraviolet-exposed mouse skin and skin tumors. *Neoplasia* **11**,  
846–855.
22. Fukunaga-Takenaka, R., K. Fukunaga, M. Tatemichi and H.  
Ohshima (2003) Nitric oxide prevents UV-induced phosphoryla-  
tion of the p53 tumor-suppressor protein at serine 46: A possible  
role in inhibition of apoptosis. *Biochem. Biophys. Res. Commun.*  
**308**, 966–974.
23. Schneiderhan, N., A. Budde, Y. Zhang and B. Brune (2003) Nitric  
oxide induces phosphorylation of p53 and impairs nuclear export.  
*Oncogene* **22**, 2857–2868.
24. Aitken, G. R., J. R. Henderson, S. C. Chang, C. J. McNeil and M.  
A. Birch-Machin (2007) Direct monitoring of UV-induced free  
radical generation in HaCaT keratinocytes. *Clin. Exp. Dermatol.*  
**32**, 722–727.
25. Brovkovych, V., S. Patton, S. Brovkovych, F. Kiechle, I. Huk and  
T. Malinski (1997) In situ measurement of nitric oxide, superoxide  
and peroxynitrite during endotoxemia. *J. Physiol. Pharmacol.* **48**,  
633–644.
26. Kalinowski, L., L. W. Dobrucki, M. Szczepanska-Konkel, M.  
Jankowski, L. Martyniec, S. Angielski and T. Malinski (2003)  
Third-generation beta-blockers stimulate nitric oxide release from  
endothelial cells through ATP efflux: A novel mechanism for  
antihypertensive action. *Circulation* **107**, 2747–2752.
27. Kalinowski, L. and T. Malinski (2004) Endothelial NADH/  
NADPH-dependent enzymatic sources of superoxide production:  
Relationship to endothelial dysfunction. *Acta Biochim. Pol.* **51**,  
459–469.
28. Malinski, T., M. W. Radomski, Z. Taha and S. Moncada  
(1993) Direct electrochemical measurement of nitric oxide re-  
leased from human platelets. *Biochem. Biophys. Res. Commun.*  
**194**, 960–965.
29. Malinski, T. and Z. Taha (1992) Nitric oxide release from a single  
cell measured in situ by a porphyrinic-based microsensor. *Nature*  
**358**, 676–678.
30. Beckman, J. S. and W. H. Koppenol (1996) Nitric oxide, super-  
oxide, and peroxynitrite: The good, the bad, and ugly. *Am. J.*  
*Physiol.* **271**, C1424–C1437.
31. Groves, J. T. (1999) Peroxynitrite: Reactive, invasive and enig-  
matic. *Curr. Opin. Chem. Biol.* **3**, 226–235.
32. Pataer, A., S. A. Vorburger, G. N. Barber, S. Chada, A. M.  
Mhashilkar, H. Zou-Yang, A. L. Stewart, S. Balachandran, J. A.  
Roth, K. K. Hunt and S. G. Swisher (2002) Adenoviral transfer of  
the melanoma differentiation-associated gene 7 (mda7) induces  
apoptosis of lung cancer cells via up-regulation of the double-  
stranded RNA-dependent protein kinase (PKR). *Cancer Res.* **62**,  
2239–2243.
33. Snyder, S. H. (1993) Janus faces of nitric oxide. *Nature* **364**, 577.
34. Schindl, A., G. Klosner, H. Honigsmann, G. Jori, P. C.  
Calzavara-Pinton and F. Trautinger (1998) Flow cytometric  
quantification of UV-induced cell death in a human squamous cell  
carcinoma-derived cell line: Dose and kinetic studies. *J. Photo-*  
*chem. Photobiol. B, Biol.* **44**, 97–106.
35. Vermes, I., C. Haanen, H. Steffens-Nakken and C. Reutel-  
ingsperger (1995) A novel assay for apoptosis. Flow cytometric  
detection of phosphatidylserine expression on early apoptotic cells  
using fluorescein labelled Annexin V. *J. Immunol. Methods* **184**, 39–  
51.
36. Lu, W., C. F. Laszlo, Z. Miao, H. Chen and S. Wu (2009) The role  
of nitric oxide synthase in regulation of ultraviolet light-induced  
phosphorylation of the alpha-subunit of eukaryotic initiation  
factor 2. *J. Biol. Chem.* **284** (36) : 24281–88 **10**
37. Parker, S. H., T. A. Parker, K. S. George and S. Wu (2006) The  
roles of translation initiation regulation in ultraviolet light-in-  
duced apoptosis. *Mol. Cell. Biochem.* **293**, 173–181.
38. Darzynkiewicz, Z., G. Juan, X. Li, W. Gorczyca, T. Murakami  
and F. Traganos (1997) Cytometry in cell necrobiology: Analysis  
of apoptosis and accidental cell death (necrosis). *Cytometry* **27**, 1–  
20.
39. Virag, L., E. Szabo, E. Bakondi, P. Bai, P. Gergely, J. Hunyadi  
and C. Szabo (2002) Nitric oxide-peroxynitrite-poly(ADP-ri-  
bose) polymerase pathway in the skin. *Exp. Dermatol.* **11**, 189–  
202.
40. Heeba, G., M. Moselhy, M. Hassan, M. Khalifa, R. Gryglewski  
and T. Malinski (2009) Anti-atherogenic effect of statins: Role of  
nitric oxide, peroxynitrite and haem oxygenase-1. *Br. J. Pharma-*  
*col.* **156** (8) : 1256–66 **11**
41. Hakozaiki, T., A. Date, T. Yoshii, S. Toyokuni, H. Yasui and H.  
Sakurai (2008) Visualization and characterization of UVB-in-  
duced reactive oxygen species in a human skin equivalent model.  
*Arch. Dermatol. Res.* **300**(Suppl. 1), S51–S56.
42. Failli, P., L. Palmieri, C. D'Alfonso, L. Giovannelli, S. Generini,  
A. D. Rosso, A. Pignone, N. Stanflin, S. Orsi, L. Zilletti and M.  
Matucci-Cerinic (2002) Effect of N-acetyl-L-cysteine on perox-

- 1 ynitrite and superoxide anion production of lung alveolar  
2 macrophages in systemic sclerosis. *Nitric Oxide* **7**, 277–282.
- 3 43. Lin, K. T., J. Y. Xue, F. F. Sun and P. Y. Wong (1997)  
4 Reactive oxygen species participate in peroxynitrite-induced  
5 apoptosis in HL-60 cells. *Biochem. Biophys. Res. Commun.* **230**,  
6 115–119.
- 7 44. Brune, B., A. von Knethen and K. B. Sandau (1999) Nitric oxide  
8 (NO): An effector of apoptosis. *Cell Death Differ.* **6**, 969–975.
- 9
- 10
- 11
- 12
- 13
- 14
- 15
- 16
- 17
- 18
- 19
- 20
- 21
- 22
- 23
- 24
- 25
- 26
- 27
- 28
- 29
- 30
- 31
- 32
- 33
- 34
- 35
- 36
- 37
- 38
- 39
- 40
- 41
- 42
- 43
- 44
- 45
- 46
- 47
- 48
- 49
- 50
- 51
- 52
- 53
- 54
- 55
- 56
- 57
- 58
- 59
- 60
- 61
45. Dimmeler, S. and A. M. Zeiher (1997) Nitric oxide and apoptosis:  
Another paradigm for the double-edged role of nitric oxide. *Nitric  
Oxide* **1**, 275–281.
46. Huk, I., J. Nanobashvili, C. Neumayer, A. Punz, M. Mueller, K.  
Afkampour, M. Mittlboeck, U. Losert, P. Polterauer, E. Roth, S.  
Patton and T. Malinski (1997) L-arginine treatment alters the  
kinetics of nitric oxide and superoxide release and reduces ische-  
mia/reperfusion injury in skeletal muscle. *Circulation* **96**, 667–675.

UNCORRECTED PROOF



# Author Query Form

Journal: PHP

Article: 682

Dear Author,

During the copy-editing of your paper, the following queries arose. Please respond to these by marking up your proofs with the necessary changes/additions. Please write your answers on the query sheet if there is insufficient space on the page proofs. Please write clearly and follow the conventions shown on the attached corrections sheet. If returning the proof by fax do not write too close to the paper's edge. Please remember that illegible mark-ups may delay publication.

Many thanks for your assistance.

| Query reference | Query                                                                                                                                                                                                                                                                                                                                                | Remarks |
|-----------------|------------------------------------------------------------------------------------------------------------------------------------------------------------------------------------------------------------------------------------------------------------------------------------------------------------------------------------------------------|---------|
| 1               | <b>AUTHOR: Title amended, please check.</b>                                                                                                                                                                                                                                                                                                          |         |
| 2               | <b>AUTHOR: This article has been lightly edited for grammar, style, and usage. Please compare it with your original document and make changes on these pages. Please limit your corrections to substantive changes that affect meaning. If no change is required in response to a question, please write "OK as set" in the margin. Copy Editor.</b> |         |
| 3               | <b>AUTHOR: To facilitate sequential numbering, reference numbers have been reordered. Please check.</b>                                                                                                                                                                                                                                              |         |
| 4               | <b>AUTHOR: We demonstrated that...cultured cells and living skin.—The meaning of this sentence is not clear; please rewrite or confirm that the sentence is correct.</b>                                                                                                                                                                             |         |
| 5               | <b>AUTHOR: Please define PI.</b>                                                                                                                                                                                                                                                                                                                     |         |
| 6               | <b>AUTHOR: developed in—Please check usage.</b>                                                                                                                                                                                                                                                                                                      |         |
| 7               | <b>AUTHOR: remains raising to—or reaches?</b>                                                                                                                                                                                                                                                                                                        |         |
| 8               | <b>AUTHOR: The amount of living cells—Do you mean <i>A large number of living cells</i>?</b>                                                                                                                                                                                                                                                         |         |
| 9               | <b>AUTHOR: detects on—Please check sense.</b>                                                                                                                                                                                                                                                                                                        |         |
| 10              | <b>AUTHOR: Please update Reference 36 with volume and page range.</b>                                                                                                                                                                                                                                                                                |         |
| 11              | <b>AUTHOR: Please update Reference 40 with volume and page range.</b>                                                                                                                                                                                                                                                                                |         |

# Proof Correction Marks

Please correct and return your proofs using the proof correction marks below. For a more detailed look at using these marks please reference the most recent edition of The Chicago Manual of Style and visit them on the Web at: <http://www.chicagomanualofstyle.org/home.html>

| <i>Instruction to typesetter</i>                               | <i>Textual mark</i>                                                                           | <i>Marginal mark</i>                   |
|----------------------------------------------------------------|-----------------------------------------------------------------------------------------------|----------------------------------------|
| Leave unchanged                                                | ... under matter to remain                                                                    | <u>stet</u>                            |
| Insert in text the matter indicated in the margin              | ^                                                                                             | ^ followed by new matter               |
| Delete                                                         | Ʒ through single character, rule or underline<br>or<br>Ʒ through all characters to be deleted | Ʒ                                      |
| Substitute character or substitute part of one or more word(s) | Ƶ through letter or<br> ——  through characters                                                | new character Ƶ or<br>new characters Ƶ |
| Change to italics                                              | — under matter to be changed                                                                  | <u>ital</u>                            |
| Change to capitals                                             | ≡≡≡ under matter to be changed                                                                | <u>Caps</u>                            |
| Change to small capitals                                       | ≡≡≡ under matter to be changed                                                                | <u>sc</u>                              |
| Change to bold type                                            | ~ under matter to be changed                                                                  | <u>bf</u>                              |
| Change to bold italic                                          | ~ under matter to be changed                                                                  | <u>bf+ital</u>                         |
| Change to lower case                                           | Ɔ                                                                                             | <u>lc</u>                              |
| Insert superscript                                             | √                                                                                             | √ under character<br>e.g. √            |
| Insert subscript                                               | ^                                                                                             | ^ over character<br>e.g. ^             |
| Insert full stop                                               | ⊙                                                                                             | ⊙                                      |
| Insert comma                                                   | ↵                                                                                             | ↵                                      |
| Insert single quotation marks                                  | ↵ ↵                                                                                           | ↵ ↵                                    |
| Insert double quotation marks                                  | ↵ ↵                                                                                           | ↵ ↵                                    |
| Insert hyphen                                                  | =                                                                                             | =                                      |
| Start new paragraph                                            | ¶                                                                                             | ¶                                      |
| Transpose                                                      | ┌┐                                                                                            | ┌┐                                     |
| Close up                                                       | linking ○ characters                                                                          | ○                                      |
| Insert or substitute space between characters or words         | #                                                                                             | #                                      |
| Reduce space between characters or words                       | ⌒                                                                                             | ⌒                                      |
